# Supplementary material for: Towards a tough reprocessable and self-healable acrylonitrile-butadiene rubber based on strong hydrogen bonding interactions
Source: Royal Society of Chemistry journal article supplement (doi:10.1039/d1tc01267c), 2021-01-01
Supplement: d1tc01267c1.pdf [file d1tc01267c1.pdf]

## Supporting Information

### Towards a tough reprocessable and self-healable acrylonitrile–butadiene rubber based on strong hydrogen bonding interaction

Wenyan Wang,<sup>a</sup> Weicheng Zhang,<sup>a</sup> Zongxu Liu,<sup>a</sup> Ying Xue,<sup>a</sup> Xingfeng Lei,<sup>\*a</sup> Guangbi Gong<sup>b</sup> and  
Qiuyu Zhang<sup>\*a</sup>

*a* Key Laboratory of Special Functional and Smart Polymer Materials of Ministry of Industry and  
Information Technology, MOE Key Laboratory of Material Physics and Chemistry Under  
Extraordinary Conditions, School of Chemistry and Chemical Engineering, Northwestern  
Polytechnical University, Xi'an, Shaanxi, 710072, P. R. China.

*b* Lanzhou Petrochemical Research Center, Lanzhou, Gansu, 730060, P. R. China.

*\*Corresponding authors: Xingfeng Lei; Email: leifeng@nwpu.edu.cn and  
Qiuyu Zhang; E-mail: qyzhang@nwpu.edu.cn; qyzhang1803@gmail.com*

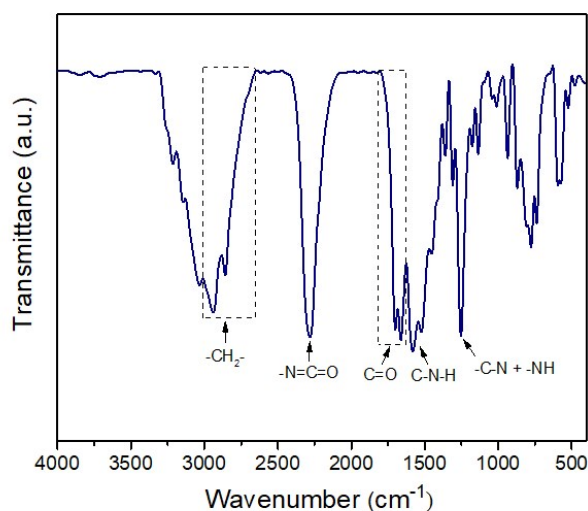

**Fig. S1.** FTIR spectrum of 2-(6-isocyanato-hexylaminocarbonylamino)-6-methyl-4[1H]-pyrimidone.

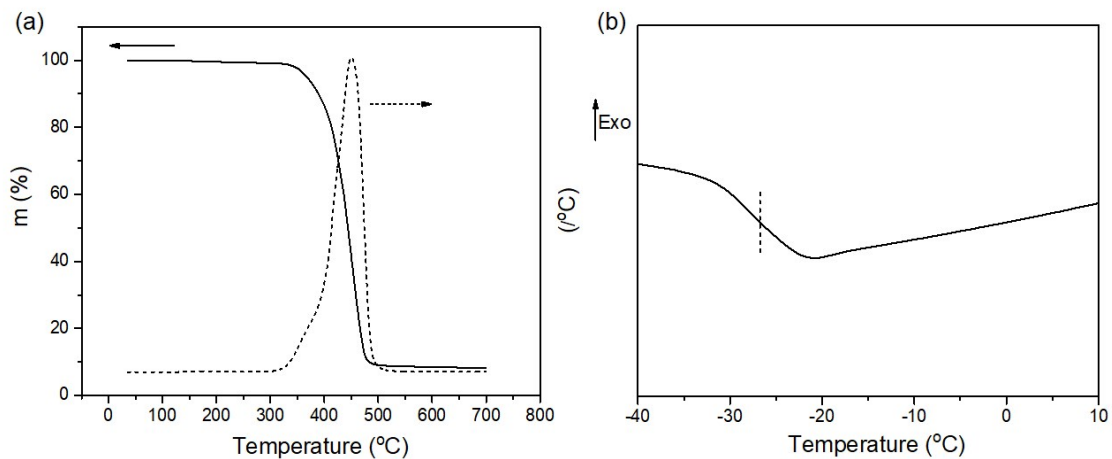

**Fig. S2.** (a) Thermogravimetric analysis curve and differential thermogravimetry analysis curves of NBR. (c) DSC curve of NBR.

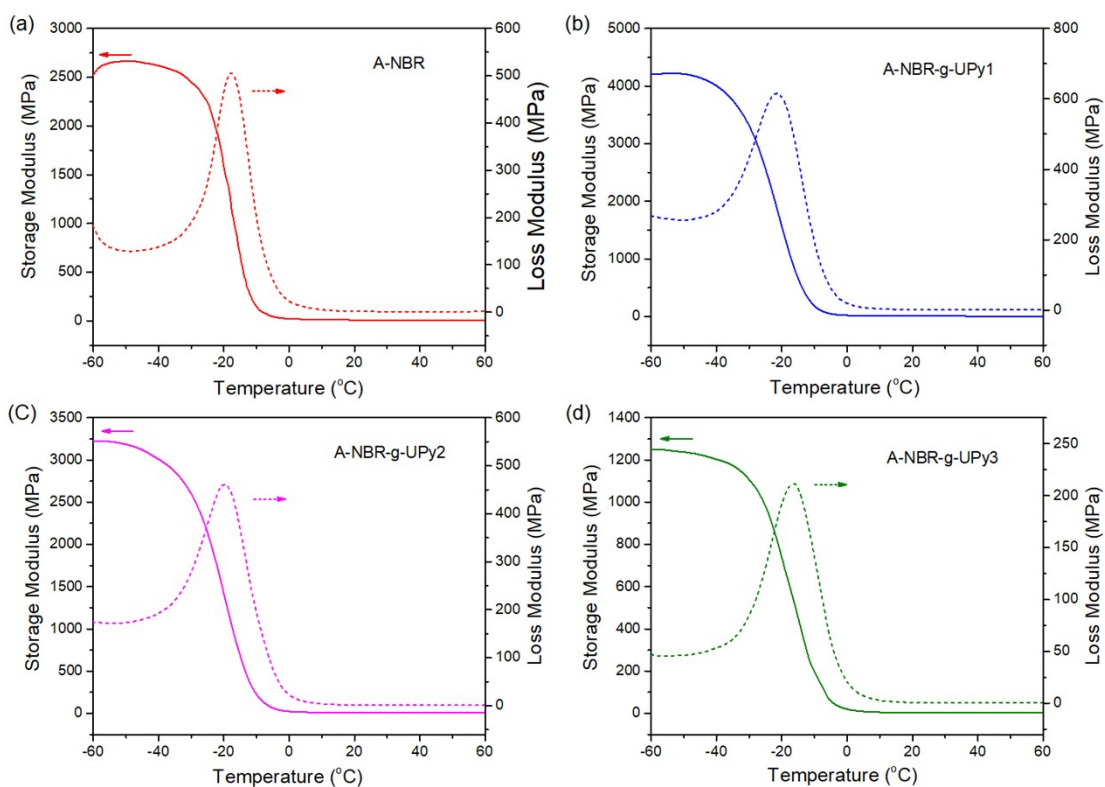

**Fig. S3.** The DMA storage and loss modulus curves of the amidoximated NBR and the UPy grafted amidoximated NBR samples varying with temperature.

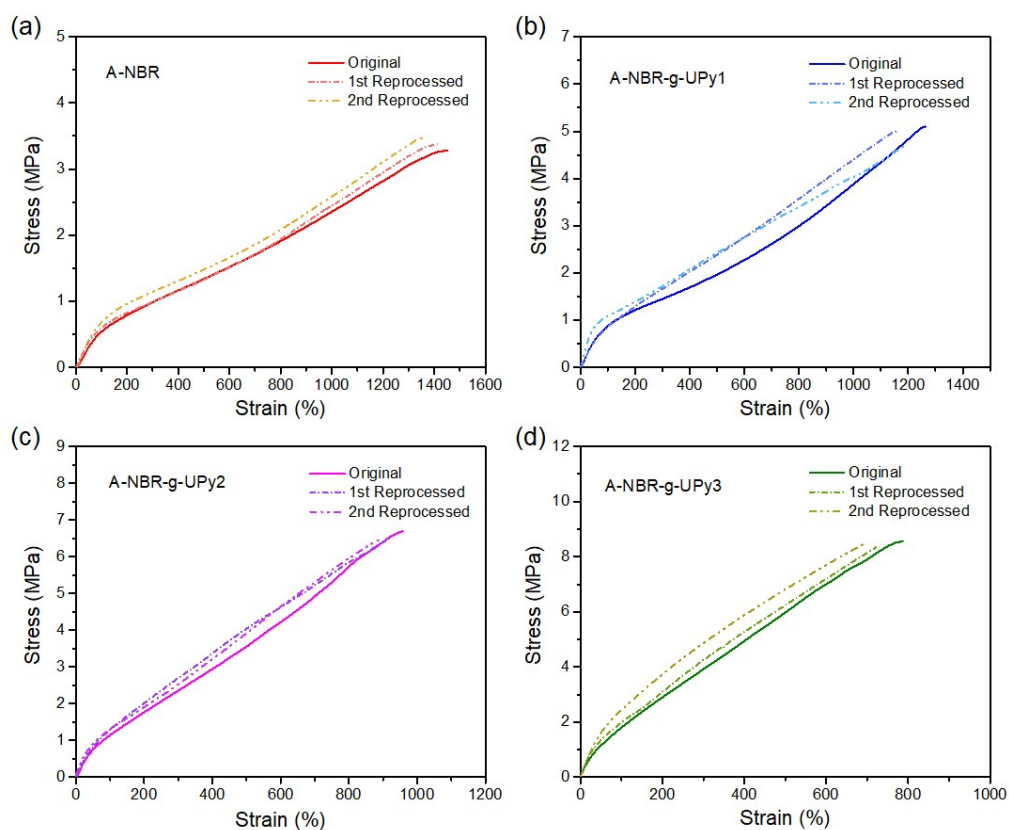

**Fig. S4.** Typical stress–strain curves of the amidoximated NBR and the UPy grafted NBR samples after multiple cycles of reprocessing.

Table S1. Thermal performance indexes and damping values of the amidoximated NBR and the UPy grafted amidoximated NBR samples.

| Sample       | $T_{5d}$ (°C) | $T_g$ by DSC (°C) | $T_g$ by DMA (°C) |
|--------------|---------------|-------------------|-------------------|
| A-NBR        | 341           | -16.5             | -6.95             |
| A-NBR-g-UPy1 | 327           | -13.2             | -5.79             |
| A-NBR-g-UPy2 | 261           | -12.0             | -4.02             |
| A-NBR-g-UPy3 | 249           | -10.9             | -3.09             |
